# Supplementary material for: A Computational Text Mining-Guided Meta-Analysis Approach to Identify Potential Xerostomia Drug Targets
Source: MDPI journal article supplement (doi:10.3390/jcm11051442), 2022-03-05
Supplement: s1 [file s1]

**Figure S2.** BiNGO overrepresentation of GO terms for Xerostomia/Dry Mouth Intersection.

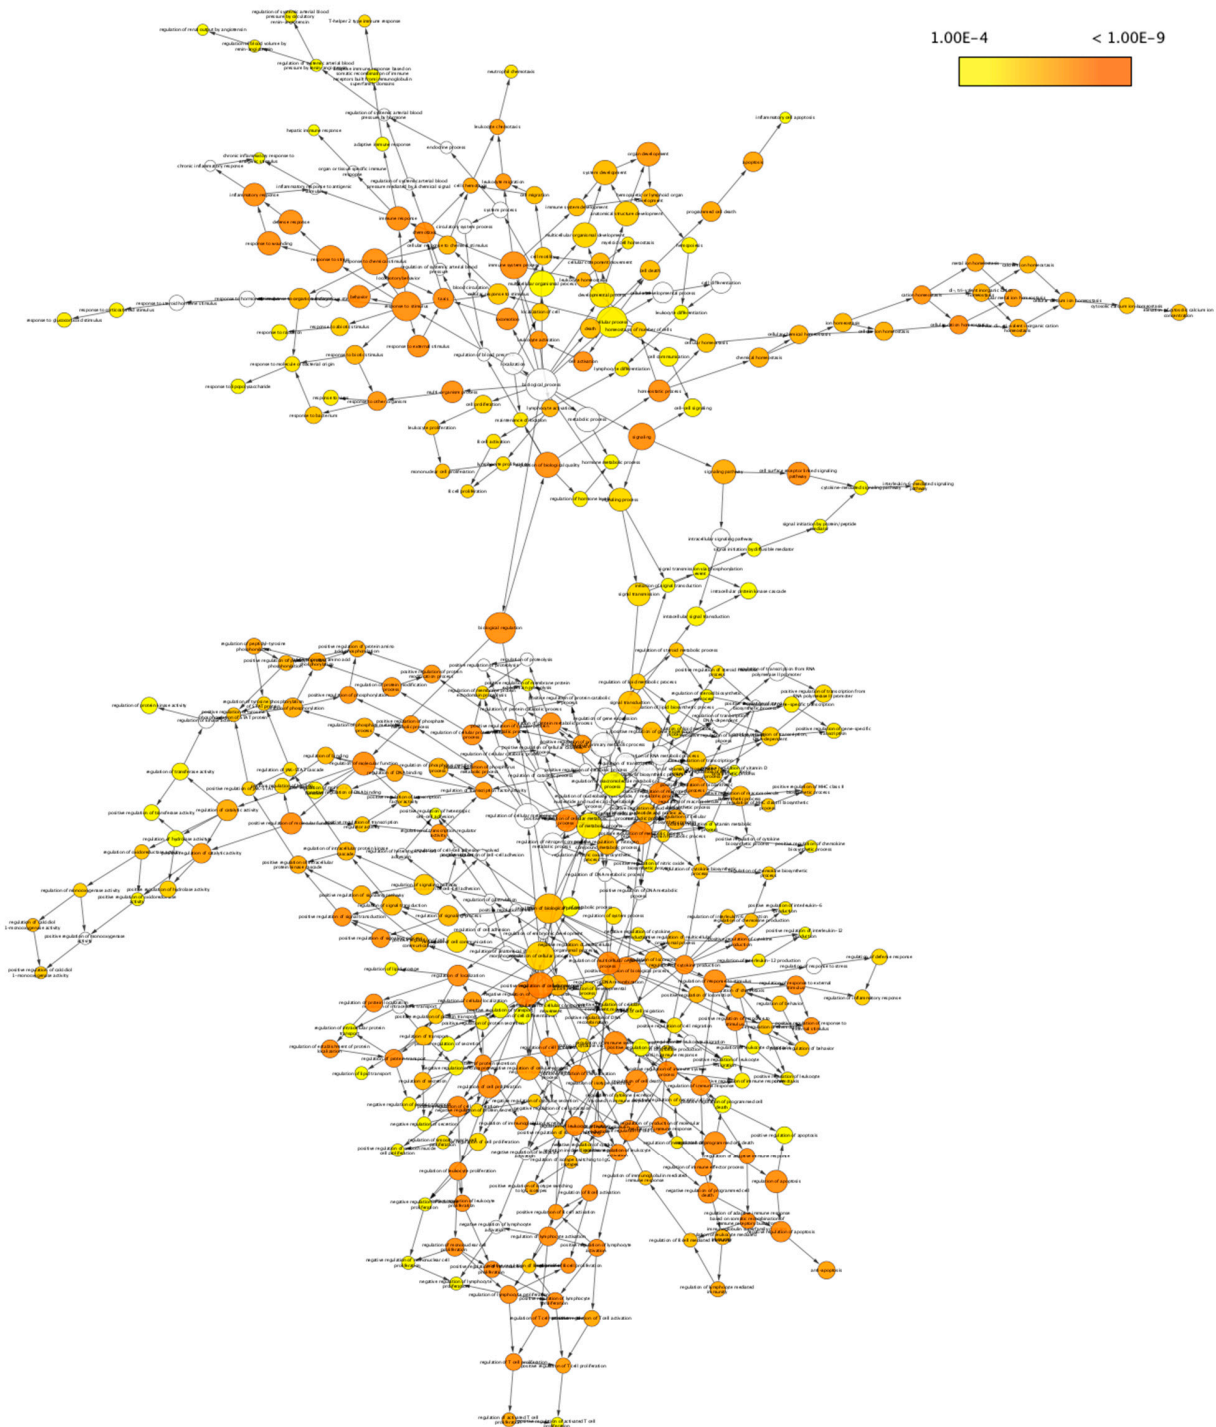

**Legend.** Biological Networks Gene Ontology (BiNGO<sub>v3.0.3</sub>) tool network of overrepresented Gene Ontology (GO) terms (n=360) in the xerostomia/dry mouth intersection protein-protein interaction network for humans. Overrepresented GO terms shown are those at  $p < 1 \times 10^{-4}$  using a hypergeometric test and false discovery rate correction.
