# Supplementary material for: A Computational Text Mining-Guided Meta-Analysis Approach to Identify Potential Xerostomia Drug Targets
Source: MDPI journal article supplement (doi:10.3390/jcm11051442), 2022-03-05
Supplement: s1 [file s1]

**Table S2.** Significant KEGG pathways via STRING enrichment in Cytoscape for xerostomia/dry mouth intersection

| KEGG pathway name                                 | KEGG ID  | FDR adjusted p-value   | Genes                                                                                                                                                                                                                                                                                                                                                                                                                                                                                                                                                                                                                                                                                                                                                                                                                                                                                                                                                                               |
|---------------------------------------------------|----------|------------------------|-------------------------------------------------------------------------------------------------------------------------------------------------------------------------------------------------------------------------------------------------------------------------------------------------------------------------------------------------------------------------------------------------------------------------------------------------------------------------------------------------------------------------------------------------------------------------------------------------------------------------------------------------------------------------------------------------------------------------------------------------------------------------------------------------------------------------------------------------------------------------------------------------------------------------------------------------------------------------------------|
| Cytokine-cytokine receptor interaction            | hsa04060 | 1.06x10 <sup>-49</sup> | <i>TNFRSF1A</i> ; <i>THPO</i> ; <i>CCL17</i> ; <i>TNFRSF10A</i> ; <i>TGFB1</i> ; <i>HGF</i> ; <i>CCL2</i> ; <b>IL2</b> ; <i>IL23A</i> ; <b>IFNG</b> ; <b>IL4</b> ; <i>IL5</i> ; <i>TNFSF10</i> ; <b>CCR7</b> ; <i>EPO</i> ; <b>CCL21</b> ; <i>TNFRSF13B</i> ; <b>IL1B</b> ; <i>EGF</i> ; <b>EGFR</b> ; <i>IFNA1</i> ; <b>IL18</b> ; <b>CXCL13</b> ; <i>KIT</i> ; <i>TNFRSF13C</i> ; <b>CXCR5</b> ; <b>CCR5</b> ; <b>CXCR1</b> ; <i>PPBP</i> ; <i>CCR1</i> ; <i>IL15</i> ; <i>CSF2</i> ; <i>PRL</i> ; <b>CCL11</b> ; <b>CXCL10</b> ; <b>CXCL8</b> ; <i>LEP</i> ; <b>CXCR2</b> ; <b>IL23R</b> ; <i>CCR8</i> ; <b>CCR4</b> ; <b>IL17A</b> ; <b>FAS</b> ; <i>CXCL9</i> ; <b>FASLG</b> ; <b>IL6R</b> ; <b>CD40LG</b> ; <b>CD40</b> ; <b>CXCR3</b> ; <b>TNFSF13B</b> ; <b>TNFRSF1B</b> ; <i>TNFRSF25</i> ; <i>IL2RA</i> ; <b>CXCL12</b> ; <i>TNFSF11</i> ; <b>IL6</b> ; <b>CXCR4</b> ; <b>TNF</b> ; <b>IL10</b> ; <i>TNFSF14</i> ; <i>CCL5</i> ; <i>CCL3</i> ; <i>VEGFA</i> ; <i>CCL4</i> |
| Hepatitis B                                       | hsa05161 | 1.89x10 <sup>-25</sup> | <i>MAPK1</i> ; <b>NFKBIA</b> ; <i>TGFB1</i> ; <b>NFKB1</b> ; <i>TLR2</i> ; <b>STAT3</b> ; <b>RB1</b> ; <i>TP53</i> ; <i>IFNA1</i> ; <i>BAX</i> ; <i>TLR3</i> ; <i>FADD</i> ; <i>PRKCB</i> ; <i>FOS</i> ; <b>CXCL8</b> ; <b>CYCS</b> ; <b>CASP3</b> ; <b>E2F1</b> ; <b>FAS</b> ; <i>STAT1</i> ; <b>FASLG</b> ; <i>MMP9</i> ; <i>TLR4</i> ; <i>HSPG2</i> ; <i>STAT4</i> ; <i>MAPK8</i> ; <i>BCL2</i> ; <b>IL6</b> ; <b>TNF</b> ; <i>MYD88</i> ; <i>PRKCA</i> ; <i>AKT1</i> ; <i>IRF3</i> ; <i>CREB3L1</i>                                                                                                                                                                                                                                                                                                                                                                                                                                                                             |
| Pathways in cancer                                | hsa05200 | 1.29x10 <sup>-23</sup> | <i>MAPK1</i> ; <b>NFKBIA</b> ; <i>MMP2</i> ; <i>TGFB1</i> ; <i>HGF</i> ; <b>NFKB1</b> ; <b>IL2</b> ; <i>IL23A</i> ; <b>IFNG</b> ; <b>IL4</b> ; <i>IL5</i> ; <i>EPO</i> ; <i>CDH1</i> ; <b>STAT3</b> ; <i>FGF10</i> ; <i>EGF</i> ; <b>RB1</b> ; <i>FGF7</i> ; <i>TP53</i> ; <b>EGFR</b> ; <i>IFNA1</i> ; <i>KIT</i> ; <i>BAX</i> ; <i>IL15</i> ; <i>FADD</i> ; <i>PRKCB</i> ; <i>FOS</i> ; <b>CXCL8</b> ; <b>CYCS</b> ; <b>CASP3</b> ; <i>EDNRA</i> ; <b>IL23R</b> ; <i>NOS2</i> ; <b>E2F1</b> ; <b>FAS</b> ; <i>STAT1</i> ; <i>TPR</i> ; <b>FASLG</b> ; <b>IL6R</b> ; <i>MMP9</i> ; <i>BAK1</i> ; <i>IL2RA</i> ; <i>STAT4</i> ; <i>MAPK8</i> ; <b>CXCL12</b> ; <i>BCL2</i> ; <i>IL6</i> ; <b>CXCR4</b> ; <i>ESR1</i> ; <i>PRKCA</i> ; <i>AKT1</i> ; <i>VEGFA</i>                                                                                                                                                                                                                    |
| Chagas disease                                    | hsa05142 | 1.29x10 <sup>-23</sup> | <i>TNFRSF1A</i> ; <i>MAPK1</i> ; <b>NFKBIA</b> ; <i>TGFB1</i> ; <i>CCL2</i> ; <b>NFKB1</b> ; <b>IL2</b> ; <b>IFNG</b> ; <i>TLR2</i> ; <b>IL1B</b> ; <b>ACE</b> ; <i>CD3D</i> ; <i>FADD</i> ; <i>FOS</i> ; <b>CXCL8</b> ; <i>CFLAR</i> ; <i>CALR</i> ; <i>NOS2</i> ; <b>FAS</b> ; <b>FASLG</b> ; <i>TLR4</i> ; <i>MAPK8</i> ; <b>IL6</b> ; <b>TNF</b> ; <i>MYD88</i> ; <b>IL10</b> ; <i>AKT1</i> ; <i>CCL5</i> ; <i>CCL3</i>                                                                                                                                                                                                                                                                                                                                                                                                                                                                                                                                                         |
| Rheumatoid arthritis                              | hsa05323 | 5.30x10 <sup>-22</sup> | <i>TGFB1</i> ; <i>CCL2</i> ; <i>IL23A</i> ; <b>IFNG</b> ; <i>TLR2</i> ; <b>IL1B</b> ; <i>ICAM1</i> ; <b>IL18</b> ; <i>IL15</i> ; <i>CSF2</i> ; <i>MMP3</i> ; <i>CTLA4</i> ; <i>FOS</i> ; <b>CXCL8</b> ; <i>CD28</i> ; <b>IL17A</b> ; <i>HLA-DRB1</i> ; <i>TLR4</i> ; <b>TNFSF13B</b> ; <b>CXCL12</b> ; <i>TNFSF11</i> ; <b>IL6</b> ; <b>TNF</b> ; <i>CCL5</i> ; <i>CCL3</i> ; <i>VEGFA</i>                                                                                                                                                                                                                                                                                                                                                                                                                                                                                                                                                                                          |
| Toll-like receptor signaling pathway              | hsa04620 | 1.96x10 <sup>-21</sup> | <i>MAPK1</i> ; <b>NFKBIA</b> ; <b>NFKB1</b> ; <i>TLR2</i> ; <b>IL1B</b> ; <i>IFNA1</i> ; <i>TLR3</i> ; <i>FADD</i> ; <b>CXCL10</b> ; <i>FOS</i> ; <b>CXCL8</b> ; <i>TLR8</i> ; <i>IRF5</i> ; <i>STAT1</i> ; <i>CXCL9</i> ; <i>TLR1</i> ; <b>CD40</b> ; <i>TLR4</i> ; <i>MAPK8</i> ; <b>IL6</b> ; <b>TNF</b> ; <i>MYD88</i> ; <i>AKT1</i> ; <i>IRF3</i> ; <i>CCL5</i> ; <i>CCL3</i> ; <i>CCL4</i>                                                                                                                                                                                                                                                                                                                                                                                                                                                                                                                                                                                    |
| Kaposi's sarcoma-associated herpesvirus infection | hsa05167 | 9.37x10 <sup>-21</sup> | <i>TNFRSF1A</i> ; <i>MAPK1</i> ; <b>NFKBIA</b> ; <b>NFKB1</b> ; <b>STAT3</b> ; <i>ICAM1</i> ; <b>RB1</b> ; <i>TP53</i> ; <i>IFNA1</i> ; <b>CCR5</b> ; <i>BAX</i> ; <i>CCR1</i> ; <i>TLR3</i> ; <i>CSF2</i> ; <i>FADD</i> ; <i>FOS</i> ; <b>CXCL8</b> ; <b>CYCS</b> ; <b>CASP3</b> ; <i>CCR8</i> ; <b>CCR4</b> ; <b>E2F1</b> ; <b>FAS</b> ; <i>STAT1</i> ; <i>BAK1</i> ; <i>HLA-C</i> ; <i>MAPK8</i> ; <b>IL6</b> ; <i>MICA</i> ; <i>AKT1</i> ; <i>IRF3</i> ; <i>VEGFA</i>                                                                                                                                                                                                                                                                                                                                                                                                                                                                                                           |
| Influenza A                                       | hsa05164 | 9.37x10 <sup>-21</sup> | <i>TNFRSF1A</i> ; <i>MAPK1</i> ; <b>NFKBIA</b> ; <i>TNFRSF10A</i> ; <i>CCL2</i> ; <b>NFKB1</b> ; <b>IFNG</b> ; <i>TNFSF10</i> ; <b>IL1B</b> ; <i>ICAM1</i> ; <i>IFNA1</i> ; <b>IL18</b> ; <i>TLR3</i> ; <i>PRKCB</i> ; <b>CXCL10</b> ; <b>CXCL8</b> ; <b>CYCS</b> ; <b>FAS</b> ; <i>HLA-DRB1</i> ; <i>STAT1</i> ; <b>FASLG</b> ; <i>TLR4</i> ; <i>MAPK8</i> ; <i>IL6</i> ; <b>TNF</b> ; <i>MYD88</i> ; <i>PRKCA</i> ; <i>AKT1</i> ; <i>IRF3</i> ; <i>CCL5</i> ; <i>FURIN</i>                                                                                                                                                                                                                                                                                                                                                                                                                                                                                                        |
| Tuberculosis                                      | hsa05152 | 1.54x10 <sup>-20</sup> | <i>TNFRSF1A</i> ; <i>MAPK1</i> ; <i>TGFB1</i> ; <b>NFKB1</b> ; <i>IL23A</i> ; <b>IFNG</b> ; <i>TLR2</i> ; <b>IL1B</b> ; <i>IFNA1</i> ; <b>IL18</b> ; <i>BAX</i> ; <i>FADD</i> ; <b>CYCS</b> ; <b>CASP3</b> ; <i>NOS2</i> ; <i>HLA-DRB1</i> ; <i>STAT1</i> ; <i>TLR1</i> ; <i>CR1</i> ; <i>FCGR1A</i> ; <i>BCL10</i> ; <i>TLR4</i> ; <i>HSPD1</i> ; <i>MAPK8</i> ; <i>BCL2</i> ; <b>IL6</b> ; <b>TNF</b> ; <i>MYD88</i> ; <b>IL10</b> ; <i>VDR</i> ; <i>AKT1</i>                                                                                                                                                                                                                                                                                                                                                                                                                                                                                                                     |
| Chemokine signaling pathway                       | hsa04062 | 3.89x10 <sup>-19</sup> | <i>MAPK1</i> ; <b>NFKBIA</b> ; <i>CCL17</i> ; <i>CCL2</i> ; <i>NFKB1</i> ; <b>CCR7</b> ; <b>CCL21</b> ; <b>STAT3</b> ; <b>CXCL13</b> ; <b>CXCR5</b> ; <b>CCR5</b> ; <b>CXCR1</b> ; <i>PPBP</i> ; <i>CCR1</i> ; <b>CCL11</b> ; <i>PRKCB</i> ; <b>CXCL10</b> ; <b>CXCL8</b> ; <b>CXCR2</b> ; <i>CCR8</i> ; <b>CCR4</b> ; <i>STAT1</i> ; <i>CXCL9</i> ; <b>CXCR3</b> ; <b>CXCL12</b> ; <b>CXCR4</b> ; <i>AKT1</i> ; <i>CCL5</i> ; <i>CCL3</i> ; <i>CCL4</i>                                                                                                                                                                                                                                                                                                                                                                                                                                                                                                                            |
| Apoptosis                                         | hsa04210 | 4.55x10 <sup>-18</sup> | <i>TNFRSF1A</i> ; <i>MAPK1</i> ; <i>GZMB</i> ; <b>NFKBIA</b> ; <i>TNFRSF10A</i> ; <b>NFKB1</b> ; <i>CTSC</i> ; <i>TNFSF10</i> ; <i>TP53</i> ; <i>ATM</i> ; <i>BAX</i> ; <i>FADD</i> ; <i>FOS</i> ; <b>CYCS</b> ; <b>CASP3</b> ; <i>CFLAR</i> ; <b>FAS</b> ; <i>PARP1</i> ; <b>FASLG</b> ; <i>NGF</i> ; <i>BAK1</i> ; <i>MAPK8</i> ; <i>BCL2</i> ; <b>TNF</b> ; <i>DDIT3</i> ; <i>AKT1</i>                                                                                                                                                                                                                                                                                                                                                                                                                                                                                                                                                                                           |
| Herpes simplex infection                          | hsa05168 | 2.42x10 <sup>-16</sup> | <i>TNFRSF1A</i> ; <b>NFKBIA</b> ; <i>CCL2</i> ; <b>NFKB1</b> ; <b>IFNG</b> ; <i>TLR2</i> ; <b>IL1B</b> ; <i>TP53</i> ; <i>IFNA1</i> ; <i>IL15</i> ; <i>TLR3</i> ; <i>FADD</i> ; <i>FOS</i> ; <b>CYCS</b> ; <b>CASP3</b> ; <b>FAS</b> ; <i>HLA-DRB1</i> ; <i>STAT1</i> ; <b>FASLG</b> ; <i>HLA-C</i> ; <i>MAPK8</i> ; <b>IL6</b> ; <b>TNF</b> ; <i>MYD88</i> ; <i>TNFSF14</i> ; <i>IRF3</i> ; <i>CCL5</i>                                                                                                                                                                                                                                                                                                                                                                                                                                                                                                                                                                            |
| PI3K-Akt signaling pathway                        | hsa04151 | 1.80x10 <sup>-12</sup> | <i>MAPK1</i> ; <i>HGF</i> ; <b>NFKB1</b> ; <b>IL2</b> ; <b>IL4</b> ; <i>EPO</i> ; <i>TLR2</i> ; <i>THBS1</i> ; <i>FGF10</i> ; <i>EGF</i> ; <i>FGF7</i> ; <i>TP53</i> ; <b>EGFR</b> ; <i>IFNA1</i> ; <i>KIT</i> ; <i>NOS3</i> ; <i>PRL</i> ; <b>FASLG</b> ; <b>IL6R</b> ; <i>NGF</i> ; <i>TLR4</i> ; <i>IL2RA</i> ; <i>BCL2</i> ; <i>IL6</i> ; <i>PRKCA</i> ; <i>BDNF</i> ; <b>CD19</b> ; <i>AKT1</i> ; <i>VEGFA</i> ; <i>CREB3L1</i>                                                                                                                                                                                                                                                                                                                                                                                                                                                                                                                                                |
| MAPK signaling pathway                            | hsa04010 | 6.06x10 <sup>-12</sup> | <i>TNFRSF1A</i> ; <i>MAPK1</i> ; <i>TGFB1</i> ; <i>HGF</i> ; <b>NFKB1</b> ; <b>IL1B</b> ; <i>FGF10</i> ; <i>EGF</i> ; <i>FGF7</i> ; <i>TP53</i> ; <b>EGFR</b> ; <i>KIT</i> ; <i>PRKCB</i> ; <i>FOS</i> ; <b>CASP3</b> ; <b>FAS</b> ; <b>FASLG</b> ; <i>NGF</i> ; <i>MAPK8</i> ; <b>TNF</b> ; <i>MYD88</i> ; <i>PRKCA</i> ; <i>BDNF</i> ; <i>FLNB</i> ; <i>DDIT3</i> ; <i>AKT1</i> ; <i>VEGFA</i>                                                                                                                                                                                                                                                                                                                                                                                                                                                                                                                                                                                    |
| Human papillomavirus infection                    | hsa05165 | 1.45x10 <sup>-10</sup> | <i>TNFRSF1A</i> ; <i>MAPK1</i> ; <i>NFKB1</i> ; <i>IRF1</i> ; <i>THBS1</i> ; <i>EGF</i> ; <b>RB1</b> ; <i>TP53</i> ; <b>EGFR</b> ; <i>IFNA1</i> ; <i>ATM</i> ; <i>BAX</i> ; <i>TLR3</i> ; <i>FADD</i> ; <b>CASP3</b> ; <b>E2F1</b> ; <b>FAS</b> ; <i>STAT1</i> ; <b>FASLG</b> ; <i>BAK1</i> ; <i>HLA-C</i> ; <b>TNF</b> ; <i>AKT1</i> ; <i>IRF3</i> ; <i>VEGFA</i> ; <i>CREB3L1</i>                                                                                                                                                                                                                                                                                                                                                                                                                                                                                                                                                                                                 |

**Footnote.** Table showing FDR significant ( $p < 1.0 \times 10^{-4}$ ) KEGG pathways with more than 25 genes via Cytoscape<sub>v3.8.1</sub>:stringApp<sub>v1.6.0</sub> STRING enrichment for xerostomia/dry mouth interaction network. Genes in bold are in the gene xerostomia/dry mouth gene set.
