# Supplementary material for: A Computational Text Mining-Guided Meta-Analysis Approach to Identify Potential Xerostomia Drug Targets
Source: MDPI journal article supplement (doi:10.3390/jcm11051442), 2022-03-05
Supplement: s1 [file s1]

**Table S3.** Drug-Gene Interaction database identified drug-gene interaction counts

| Gene <sup>a</sup> | # of drug-gene interactions <sup>b</sup> |
|-------------------|------------------------------------------|
| ACE               | 66                                       |
| AGT               | 14                                       |
| ALB               | 21                                       |
| APOA1             | 8                                        |
| CASP3             | 33                                       |
| CAT               | 1                                        |
| CCL11             | 3                                        |
| CCL21             | 1                                        |
| CCR4              | 3                                        |
| CCR5              | 15                                       |
| CD19              | 13                                       |
| CD4               | 9                                        |
| CD40              | 11                                       |
| CD40LG            | 11                                       |
| CR2               | 1                                        |
| CXCL10            | 12                                       |
| CXCL12            | 7                                        |
| CXCL13            | 1                                        |
| CXCL8             | 56                                       |
| CXCR1             | 5                                        |
| CXCR2             | 11                                       |
| CXCR3             | 1                                        |
| CXCR4             | 20                                       |
| CYP19A1           | 36                                       |
| E2F1              | 16                                       |
| EGFR              | 178                                      |
| FAS               | 19                                       |
| FASLG             | 1                                        |
| FOXP3             | 3                                        |
| HSD3B1            | 1                                        |
| IFNG              | 17                                       |
| IL10              | 17                                       |
| IL17A             | 16                                       |
| IL18              | 7                                        |
| IL1B              | 37                                       |
| IL2               | 32                                       |
| IL23A             | 6                                        |
| IL23R             | 1                                        |
| IL4               | 4                                        |
| IL6               | 25                                       |
| IL6R              | 9                                        |
| MPO               | 21                                       |
| NFKB1             | 90                                       |
| NFKBIA            | 9                                        |
| PRTN3             | 2                                        |
| PSMA5             | 5                                        |
| PSMB8             | 8                                        |
| RB1               | 23                                       |
| REN               | 8                                        |
| SOD1              | 4                                        |
| STAT3             | 23                                       |
| TNF               | 68                                       |
| TNFRSF1B          | 11                                       |

**Footnote.** <sup>a</sup>Drugs identified in the xerostomia/dry mouth intersection network. <sup>b</sup>Number of drug-gene interactions identified using the Drug-Gene Interaction database
