# Supplementary figures and images for: A Computational Text Mining-Guided Meta-Analysis Approach to Identify Potential Xerostomia Drug Targets
Source: MDPI journal article supplement (doi:10.3390/jcm11051442), 2022-03-05

**Figure S3.** Gene Expression confidences for 19 out of 20 tissue types

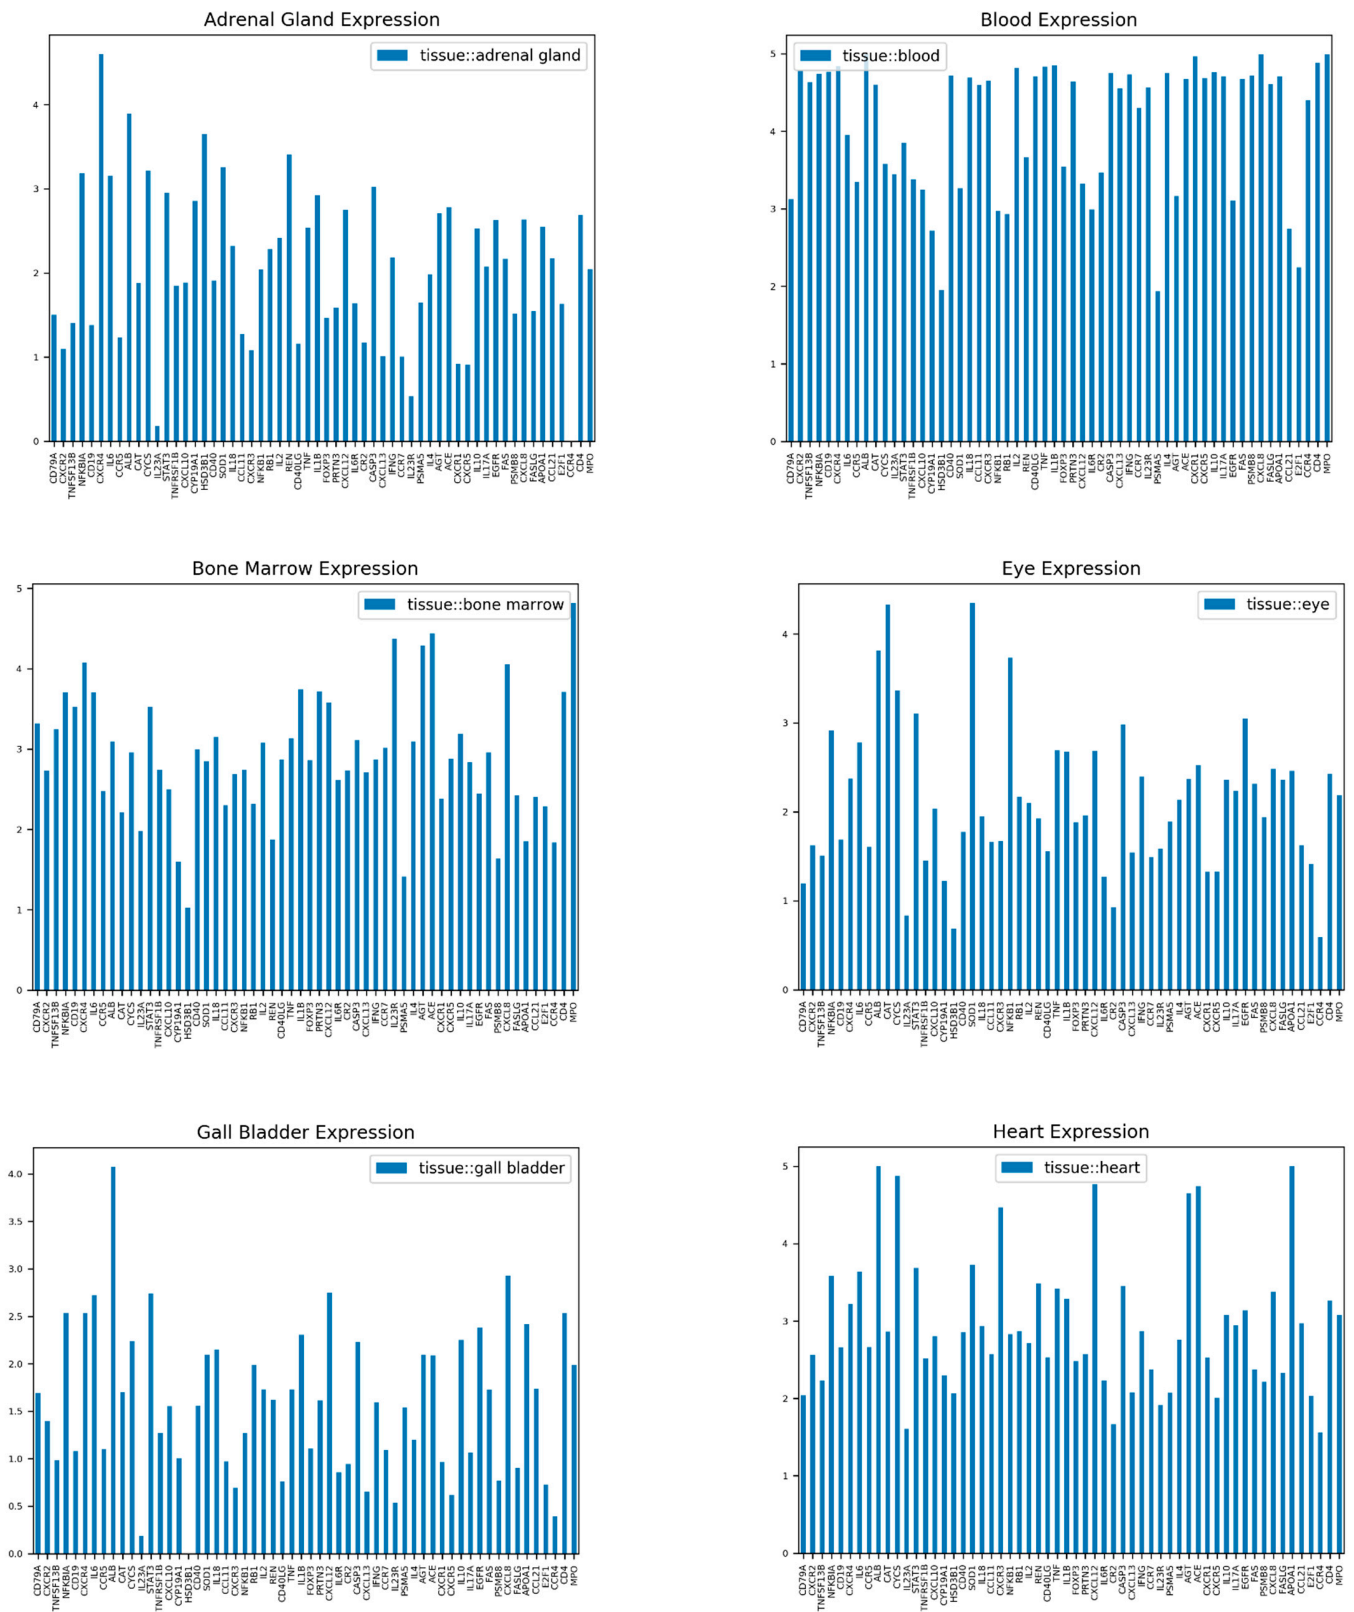

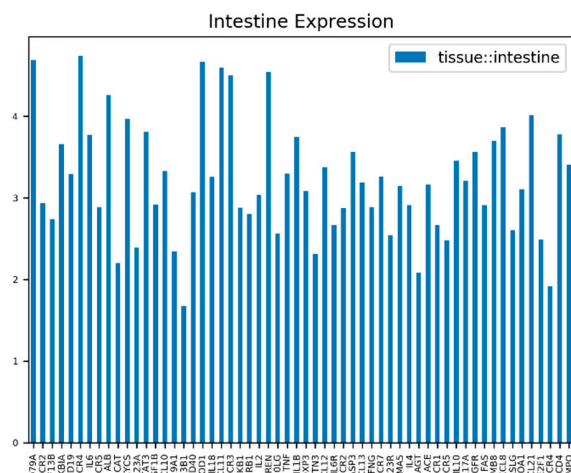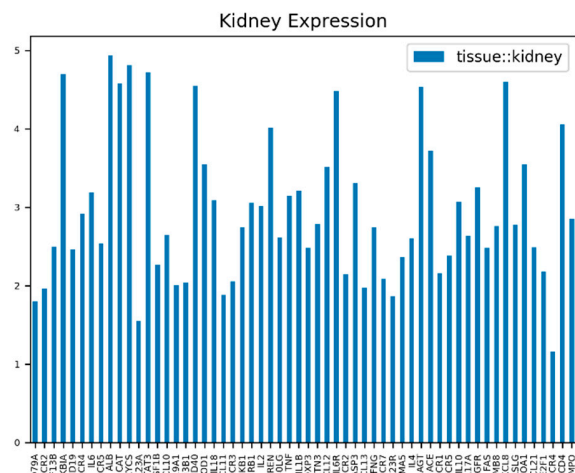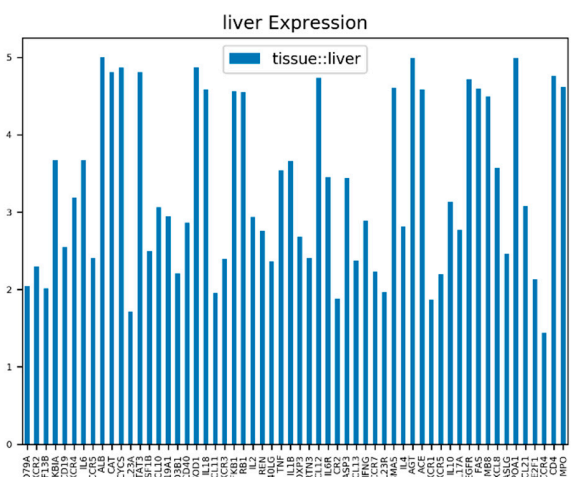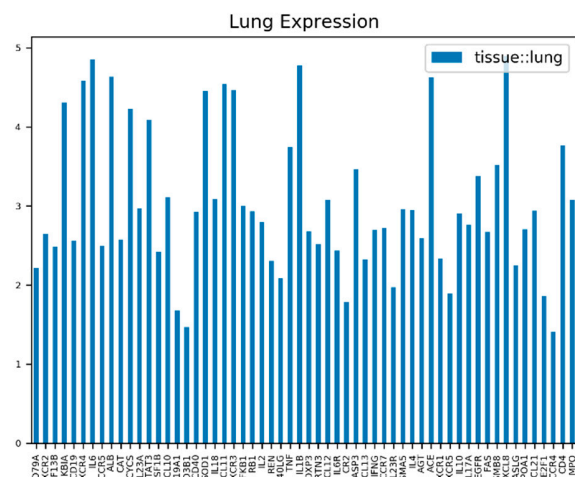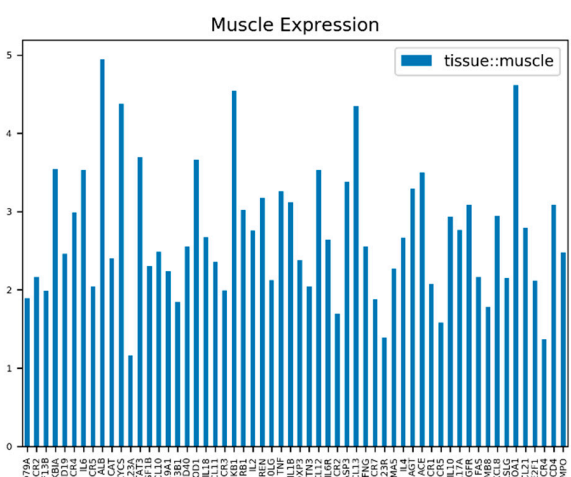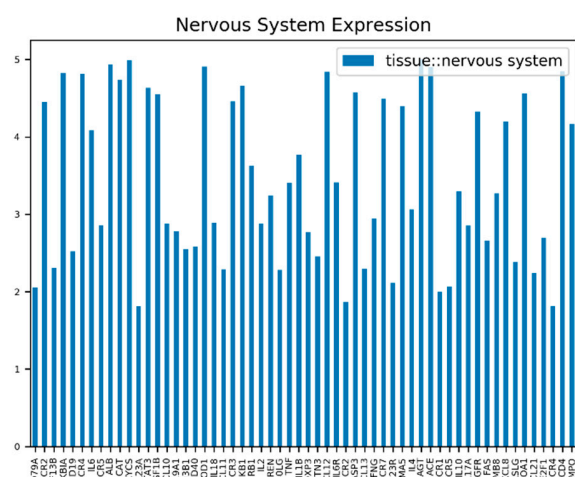

Pancreas Expression

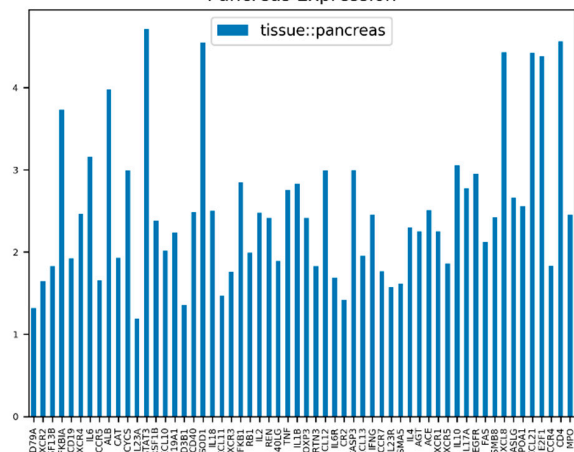

Supplement: s1 [file s1]
